# Supplementary material for: A Set of Molecular Markers to Accelerate Breeding and Determine Seed Purity of CMS Three-Line Hybrids in Brassica napus
Source: MDPI journal article supplement (doi:10.3390/plants12071514), 2023-03-30
Supplement: s1 [file s1]

|   | 1 | 2 | 3 | 4 | 5  | 6  | 7  | 8  | 9  | 10 | 11 | 12 |
|---|---|---|---|---|----|----|----|----|----|----|----|----|
| A | 1 | 3 | 5 | 7 | 9  | 11 | 13 | 15 | 17 | 19 | 21 | 23 |
| B | 2 | 4 | 6 | 8 | 10 | 12 | 14 | 16 | 18 | 20 | 22 | 24 |
| C |   |   |   |   |    |    |    |    |    |    |    |    |
| D |   |   |   |   |    |    |    |    |    |    |    |    |
| E |   |   |   |   |    |    |    |    |    |    |    |    |
| F |   |   |   |   |    |    |    |    |    |    |    |    |
| G |   |   |   |   |    |    |    |    |    |    |    |    |
| H |   |   |   |   |    |    |    |    |    |    |    |    |

**Figure S1.** Schematic diagram of the sample loading.

N (KP161618.1):

GGCGCTCTACCTCTGGCTATGCTATTTTTCTTGGTCCCAATCTTATTTTCATGGCGCGCC  
AAGAAAGAACCTACAGTCTCTCGTTCTAGTGCTGAGTCTGAATACCGCTCGCTTGCCT  
TTGCTGTTGCTGAGTCTCACTGGATTACTCAGTACTTCGCGAGCTTTGTCTCTTTCTTC  
CTCACCTGTTTCAGATCTATTGTGATAACATCAGAAAACTTATATGACTGCCAATCCT  
GTTTCATCATGCTCGCTCGAAACATATTGAAATTGACTACCATTTTTGTACGGGAAAAGG  
TTGTCAAAGGTGACATTATTGTGCAATATATTCCCACATCCGAGCAACTTGCTGATAT  
CTTCACGAAGGGCCTCCCCTCTGCCCAATTTCACTACCTTCGCTCCAATCTTCGCATCC  
TTCCACCTTGCTCCGATTGAGGGGGAGTCTTAGTGTATCTAGGTTATACTGTTAATTGT  
GTCGTATGTATTAGCCCAAGGGCTTAATTGTAATTTGACTTGAAGAGATCATCTATAT  
AAATAGACATCTGATGCCCTAATTAGGGCTAAGCACTGAAATTTGTCCTAAACCAATT  
TCAGAAACATTTTGTATGGTGGGGAGTGAAAACACCAATGCAGCAGAGAACGACC  
GTATTAATCGGAATCTACTTATATTAAGACAGACGACCGAGAAAGAAAAGAAAGGC  
TCCACGTTCTCCAAGTGCTTAATCTTAGCGTGCTAGCCGCTGCTTCATTTCGTTTTCTG  
ATAGTGAGAACGCTTTCTCTTTCTTAGCGCTCCGCACCCTTGATAGTAAGGGGAACT  
CTGGTTGCGCGGCTTTCTCTTATAGGGGTCTATTTTCTCTGACTTGACTCAGCTTGACCT  
ACTTGACTCAGCGGTTAGAGTATCGCTTTCATACGGCGAGAGTCATTGGTTCAAATCC  
AATAGTAGGTAAAACCGGCCGAAACCCCTGCTTTTTCCAGCATGACAGCAAGCACGG  
ACTGGCAGCAAGGATGAAACTGAATGACCAAAGCATCGGTTGCTTCCACTTGTGGCC  
TTCTTCGACCGCCTTGACACCTTACTTAATATCAAGGCAGCCACATACATGAAGAGA  
AGAATTGGGTTTAGCGGTAATGGCATAAGCCAAAGCTAGATCACCGGAGTTTAGGCA  
AATGGGTACGAGAGAAAAAGGTTTTGAAATGCATCTTCCGAAACCAGATAATCAACC  
GAAGGAGATTCCCCTGCAAAAAGGAGATGGCTCTAGTTTCATACTAATCTTCGATCTT  
CGAGATTCCCCACGGAGCGGTAAGGCATCCCAAGGAGCGAAGCGGCTCAAAGGAT  
TGGCAATGAAGCTCAGTCTGGTCTGAGGGGATGGGCTAGGCTACTCTCCCACATACAT  
AGGAAGAGGGGGAAGTCAAGTACCTAGATCCAAGATCACGATATCCGCTTTGGTGGT  
AATATCCGGCATAAAAAGAAAGCACCAAAGCAAACAAAGTCGATTCTTTGTTGAGTCA  
ACTGGCAACTGGGATTGCAGCGGATCTAGTGGTTCTCCTATTCTATGGTCTTCTGCTG  
AGAGAGTAAGAATAGAAAGCAGAAGCTCGCCCGGGCGAAAGACAAGGGATGAT  
TCTTCTAAGATACGAACTTGCGGAAGGAATGAAAAGGTATTGACTAAGACGGGGAC  
GGGTATTCCCGAAGATGCTTGACCTAAGAGATAGAGACGAGAACGAGACTAAGAAA

ATCAGATATTGGAGAGGAAAGAAGCAGTGCGAGTAGAGTAGAGCAGCTTGGTAGCT  
CGCAAGGAGCGAAGCCTGCTTGACCAACGGGAGAAGCCAACTCCGTTCTCCAGCTT  
CGCTGAAGAAGCTAGGTTCTCCTTGATGTCGTAGGTTCAAATCCTATCTCCGCACTA  
AGTAAGGGTTTCATTCTGCATCACTCTCCCCGTCGTTCTCGACCTCGCAAGGTTTTTGA  
AGCGGCCGAAGCGGGAAGTGACAATACCGCTTTTCTTCAGCACATTTTGGATGATTG  
AGCGAAAACGGAGTACAAAGTTCAGCCTTTAAGGAGGCTATGAATCAAATAGGGCT  
GGTGGCGCAGTCCCCACTTGACCAATTTGAGATTGTCCCATTGATTCCCTATGAATATC  
GGAACTTCTATTTCTCATTACAAAATCCATCTTTGTTTCATGCTGCTAACTCTGAGTTTT  
TTCTACTTCTGATTCATTTTATTACTAAAAAGGGAGGAGGAACTTAGTCCCAAATG  
CTTGGAATCCTTGGTAGAGCTTCTTTATGATTTCTGCTGAACCTGGTAAAGGAACA  
AATAGGTGGTCTTTCCGGAAATGTGAAACAAATGTTTTTCCCTTGCACTTGGTCACTT  
TTCTTTTTTTGTTATTTTGTAAATCTTCAGGGTATGATACCTTATAGCTTCACAGTGACAA  
GTCATTTTCTCATTACTTTGGCTCTCTCATTTTCTATTTTTATTGGCATTACTATAGTGGG  
ATTTCAAAGACATGGGCTTCATTTTTTCAGCTTTTTATTACCCGCAGGAGTCCCCTGC  
CGTTAGCACCTTTTTTAGTACTCCTTGAGCTAATTTCTTATTGTTTTCGCGCATTAAAGCT  
TAGGAATACGTTTATTTGCTAATATGATGGCCGGTCATAGTTTAGTAAAGATTTTAAAG  
TGGGTTGCTTGGACTATGCTATGTATGAATGAGATTTTCTATTTTATAGGGGCTCTTG  
GTCCTTTATTTATAGTTCTTGCAATTAACCGGTCTGGAATTAGGTGTAGCTATATTACAA  
GCTTATGTTTTTACGATCTTAATCTGTATTTACTTGAATGATGCTATAAATCTCCATTAA  
AGTTCTTCTTTCTTTTATTAGATT

S(FR715249.1):

GGCGCTCTACCTCTGGCTATGCTATTTTTCTTGGTCCCAATCTTATTTTCATGGCGCGCC  
AAGAAAGAACCTACAGTCTCTCGTTCTAGTGCTGAGTCTGAATACCGCTCGCTTGCTT  
TTGCTGTTGCTGAGTCTCACTGGATTACTCAGTACTTCGCGAGCTTTGTCTCTTTCTTC  
CTCACCTGTTCAGATCTATTGTGATAACATCAGAAAACCTATATGACTGCCAATCCT  
GTTTCATCATGCTCGCTCGAAACATATTGAAATTGACTACCATTTTGTACGGGAAAAGG  
TTGTCAAAGGTGACATTATTGTGCAATATATTCCCACATCCGAGCAACTTGCTGATAT  
CTTCACGAAGGGCCTCCCCTCTGCCCAATTTCACTACCTTCGCTCCAATCTTCGCATCC  
TTCCACCTTGCTCCGATTGAGGGGGAGTCTTAGTGTATCTAGGTTATACTGTTAATTGT  
GTCGTATGTATTAGCCCAAGGGCTTAATTGTAATTTGACTTGAAGAGATCATCTATAT  
AAATAGACATCTGATGCCCTAATTAGGGCTAAGCACTGAAATTTGTCCTAAACCAATT  
TCAGAAACATTTTGTATGGTGGGGAGTGAAAACACCAATGCAGCAGAGAACGACC  
GTATTAATCGGAATCTACTTATATTAAGACAGACGACCGAGAAAGAAAAGAAAGGC  
TCCACGTTCTCCAAGTGCTTAATCTTAGCGTGCTAGCCGCTGCTTCATTTTCGTTTTCTG  
ATAGTGAGAACGTTTTCTCTTTCTTAGCGCTCCGCACCCTTGATAGTAAGGGGAACT  
CTGGTTGCGCGGCTTTCTCTTATAGGGGTCTATTTTCTCTGACTTGACTCAGCTTGACCT  
ACTTGACTCAGCGGTTAGAGTATCGCTTTCATACGGCGAGAGTCATTGGTTCAAATCC  
AATAGTAGGTAAAACCGGCCGAAACCCCTGCTTTTTCCAGCATGACAGCAAGCACGG  
ACTGGCAGCAAGGATGAAACTGAATGACCAAAGCATCGGAAAAGCAGAGGAGTGTG  
CTGACTTCAGTAGCTAGTCAACCAACTTCTGCTCAACCCTAGGAACAAGGAAAGTAT  
CAGCCGATAACTCTGTTCACTTGGTGTGGGATTCTAAAAGTTTACTATTATCGCACG  
CCAAAGAGTGTGCTGAAAAGGGAATAGTTGGTTAACTACCGAAGCTAGAAAACAAAT  
ACCTGCTAAAACCAAGGGAAGCAAGAGTAGGAACTACCCACCCAGGAATCAGCATT  
CTAAACTGCAGCACAAGCACAACCCTGCTTTTCCATTCTTCATAGCCCACCTCTTCA  
TTGGCCATAAAGCCTTGATTTCTTGACCACGTACACTGATGATTGGTCGGGCTGGG  
CTACTCTATGGGCGTATGCGCCTAAACCAGGCTCAAAGCGATGAGACTTCTCGGTTA  
GACTCAAACAATAGATCAGGTCAGTTTTGAGGAGCTTTATTTGACTTAAGAAGAAAG  
GGCAGCCCTCTGATATATCTTTGACTTCACCCTCGGCCAAAGCACAGTAAGTTAGAG  
ACTCCTAGTCTCTACTAAATCAATCTATAGCTTCAACACTCTCCTAGCGCAGCAACCT  
TCTCTCTTTCTCCCTTACTTGCCTCCAGTCTTGAGCAGCAATCATCTTTGCTTATGCGG  
ACGAAAGTCTTTCCACAGCACTCCGACAGAAGTCTCATATGATGACTCTGTTTACTCA  
AGAGCCTTCTTTCTGATTAAATGCCTGCCCACTACCCCAAGCAAGCCGCATAGGTCT  
TTGTTAGCAGCTAGGCTTCTGTTTCTTTCCATAAGCGACTTCTCCTGTAGATGCCCAA

ATAAAGCTTTCGCTCAAGGGATATCGCTTCATTTACTGCGTTAGGGTGGTGCCAAAGCC  
CTTCATCTCTGGCTAAGGCTCAGTCAGATAGGCTCAATATCGGGCTTATCCGGCGAAG  
TCTCAAACCTCTGTTGTGCCAGGGATATCAGGCTTGAGTTGGGACAGGTGCTTATTTTCG  
ATACCGCTTCTGTTTGTGTTTTTGTGATGCTAGTGATCACATTTACAGTTAGAAGTAG  
GCCATGATTGATTAGCTAGAGTAGAGCTAGGTTGGTGCTGCTTTGCTTGGCAATCCTT  
GATCTAATTGAATCAGAATCCGCAAGATAAGTAGCCGAACGAGCAGAGCAGTAGAA  
GGACAGGTCATCTAGAATCCTATTCTTCCGATGCTTTGATCGGTTCCCTTCTGATATGGA  
AGAGTTGACTACCCAGCACATCTTTGTTTGCTCGACTCGGTAAGTACAGCCGCTTCCT  
TTATTCTTTTCTTTGAACCATTACTCTCAAGGGACTACTCCGTTGGCCCAGTGAACCTT  
GGTCTTTTGTGCTGTTCCCCGTTCCCTTTATCAGCTCTTTACCAGCTATCCGATTACCA  
ATGAACAATAGCTATGACCGATAACCAAGGTTCTGTAGAACTCTATAAGGAGAGGC  
ATAGACCGGTGGTCCCTTCCAAGTGCCTCTTTGTTTTGTACGAGCTGTTTCCAAGTGTT  
TTGATTAGTCGAGTCTTCTTCTGAGTCCAGCACTTTTCCCTTGTCCGATCGTCCGTCTCT  
TCCTCTCCTCTTGGTCGAGTTGCTAAAGCACCTATCTTTCTGATCCGAAGCCAAGGGA  
TGTGCGATGTTTCTTTCTTTGTTATTGTGCTAATTGCACTTTAGATTGAGAAGATAGG  
ACTGATCGGTATCCATTGAAGATTCCCTTGCTTATCGGCATTCCCTGCCCTGTGCACTGC  
TTCCTCAGCTTCGAAGCTTGTTTTGTTTGTCTCGAAGATTGACGACTTATCGGCTGTTG  
ATTGACCGGTATCTGGTATGCTTCTTCTTCTTACAGTCGACTGTTGCTACTTCGGACT  
ACTACCATTCACTGCTGAGAAGAAGCTGTTGTTAAGGAGCGGCACCGATCAGTGCC  
TTGTTCCCTGTTACCAGTGTCTTGTCTTGGTTCCTTGTGCCCATTTGTCTCCTAGTGTTTTGT  
TGAGTTTACTGTGTCGATAAAGTCCTTTTTATTTCGAGGAAGTGAGCCTTTTCAATTAC  
AATTCCTTTATTCGTCCGAGTTTACTGTGCCATTTTCGAGACTGTCCTTCATCCGAGGTA  
TCGTGTTTATTGTGCCATTTATAGACATTGAGGACATTACTGTGTTGTACCAAGCACCA  
ATAGTGTGAGGATTAAGCCGTTATTCTATCTTCCCTCCTTCGCTCTAACGGGTGGATT  
GCTCTAACAGGAGGATTCCGCTCACTTGGGGTGGAGTAGCGTATGCACCTCTCTTCT  
TTGTTGCTTCCGGTGTGCTACCGAGCCTTCCAGGTATTTACTTACTGCCGTTTACTC  
CACAGCATTGCCATCTTCTTTGTTTTGTTGGTATGAGCTGATCGGCCCTCTCAAGCGTA  
AAGTAGTCCTCTGATTGTGTTGTATTGGCTCCTTAAGCAACATTTGTTTACTTATGACC  
GGGTGCTGCTTATGCCTAGACATCTTCCCCAGGACTTCTTCTCGAAAGACGTTGACCT  
ATGGTAGGTGCTGAGTCCAGCACAGTTGTTCCCTTGTACTGTGCCATTTTGAGACCTT  
CGTCCGATCATTGTTCCCTTGAAGACCTGTCTTTTATTCCTTCTCTTCCCTGCAGTAAT  
TAACTCACATTTATGGTAATGCTGATGCTTGGCAGCTTCACTGTTCCCTTCTTGTGTGC  
GTAGGCTTGGCGTTGTTTACTCCACCGTGCTATCTTTGTGCTGCTAATCAGTATAGTAT  
ATTCTTTGCATACTGCTATCTTTGTGCTAATCCATTTTCAGTAAACGGGAAAGTGGAGG  
AGTAATGCTTGGTCAAAGTGCTGTAGATTTGTTTCGGTACGAGCACTGCCTTTGTGCTA  
ATCATCATTTAGTATATTCTTTCTTTCGTGTTCCATCCTGATTAATCTGTAATCTATGT  
TTTGTACAGCTGGCTTGGGAATCATCAGTAGAGTCTTCTGCTCCTGATCTGTCAACTT  
TCTTTCGTACGGCTGCTTGGCGTGCTGTCATCTTTGCTACTCCGCTTCGTACGGTTTTGG  
GTGAAGGTTCAATCTTTTGTTCGTACGAGTCGGATATGTTTGTGCGAGAAGAAGGAC  
AGCTTTCGTAGAGAGTCCGATCAATCTTCCACTCTTGCACTTGCAATTCATTCCGTTCTC  
CTCTCAGTTCCGTCTAAATCCCCTCGTCTGACTAAAGCACCTCTCCGTGTTCCGTGCGA  
TCACCTAGATAAAATTAAGTATAGTAATAAGAATGAAAAGTATGGCTTAGCGTGTTGG  
ATCAATCAGTCATTGCTTTCATCTTGAATTAAGTATATAGAAAAGAAGTGTTGTCTGC  
GCCAAGTCTAGAAGTGGTAGTATTAGCGATCCTATTGAGGTGTTTATCGGGTTCGCTG  
CTCGAATTTCAATAAAGTCAAGTTTCCTCAATCCCGTTTCTGTTGAGTTGCCAAGATTT  
CTCAATCCTTGTATTAGTTGATCCTTTTGTATTTCGAAAGGTCGGCGGGATGCTACTT  
CAGGTAGGTACGGGCGCTCTATCATTGTCTGATTTTAGGTTTCTGATCGCTAGCCTGC  
CGGGCTGCCCCCGCGATCAAATCTCATAAGAGAAGAAATCTCTATGCCCC  
CTGTTCTTGGTTTTCTCCCATGCTTTTGTGTTGGTCAACAACCAACCACAACCTTCTATAGT  
TCTTCACTACTCCTAGAGGCTTGACGGAGTGAAGCTGTCTGGAGGGAATCATTTTGT  
GAAATCAATTAATCTAATCATGCCTCAACTGGATAAATTCATTATTTTTCACAATTCT  
TCTGGTTATGCCTTTTCTTCTTACTTTCTATATTTTCATATGCAATGATGGAGATGGAG  
TACTTGGGATCAGCAGAATTCTAAACTATGGAACCAACTGCTTTCACACCGGGGGA  
AGACCTCCTGAGCAAGGGAAGGCTTGGAATAAATCGTAGTTCAGATTCAGTTCGGT

TCGAGGTATCAGCGTTGGCCGCCATTATTTTATCATTTTCGTGGTCCCAAATTGGGA  
CCAGTTTTCTACATTATATATAATTTTTTTTGTGTTGGGGTTGAAATGGGGGGTATTA  
GGAAATGAAATTTGTCATTTTCGGCGTCGGACCAGATGGCGTCGCGCCCCCAGCGCTG  
GATCTCAACGAGCGCCCCGCTCTGCATCTTTGTACGCGGATGTTGAGAGTTCCGACT  
CTCAACAAGCGCGAAATAATGACATGTACGCGCATCTTAGGCGCGTACAGGAGATCA  
CCAAAAAAGTAGAGGGTGAGCGCGATATCGTGCGGCGTCAAGCCCTCCTGGATATAA  
TGAAATGGGAGGTCAGAAGCCTTCAGGAGCACTTTCGGATCTTTCGGCACCTTGATCG  
TCTGCGAGATTTCGAGAGAGCCAAGGTGAACGAGATCCTTGATCTCTTTCGCTGAAG  
AAGCTAGGTTCCCTCCTTGATGTCGTAGGTTCAAATCCTATCTCCGCACTAAGTAAGGG  
TTTCATTCTGCATCACTCTCCCCGTCGTTCTCGACCTCGCAAGGTTTTTGAAGCGGCCG  
AAGCGGGAAGTGACAATACCGCTTTTCTTCAGCACATTTTGGATGATTTGAGCGAAA  
ACGGAGTACAAAGTTCAGCCTTTAAGGAGGCTATGAATCAAATAGGGCTGGTGGCGC  
AGTCCCCACTTGACCAATTTGAGATTGTCCATTGATTCCTATGAATATCGGAAACTT  
CTATTTCTCATTACAAATCCATCTTTGTTTCATGCTGCTAACTCTGAGTTTTTTCCTACT  
TCTGATTCATTTTATTACTAAAAAGGGAGGAGGAACTTAGTCCCAAATGCTTGGCAA  
TCCTTGGTAGAGCTTCTTTATGATTTTCGTGCTGAACCTGGTAAAGGAACAAATAGGTG  
GTCCTTCCGGAATGTGAAACAAATGTTTTCCCTTGCATCTTGGTCACTTTTCTTTTTT  
TGTTATTTTGTAATCTTCAGGGTATGATACCTTATAGCTTCACAGTGACAAGTCATTTT  
CTCATTACTTTGGCTCTCTCATTTTCTATTTTTATTGGCATTACTATAGTGGGATTTCAA  
AGACATGGGCTTCATTTTTTCAGCTTTTTATTACCCGCAGGAGTCCCACTGCCGTTAGC  
ACTTTTTTTAGTACTCCTTGAGCTAATTTCTTATTGTTTTCGCGCATTAAAGCTTAGGAAT  
ACGTTTATTTGCTAATATGATGGCCGGTCATAGTTTAGTAAAGATTTAAGTGGGTTCG  
CTTGGACTATGCTATGTATGAATGAGATTTCTATTTTATAGGGGCTCTTGGTCCTTTAT  
TTATAGTTCTTGCAATTAACCGTCTGGAATTAGGTGTAGCTATATTACAAGCTTATGTT  
TTTACGATCTTAATCTGTATTTACTTGAATGATGCTATAAATCTCCATTAAAGTTCTTCT  
TTCTTTTATTTAGATTT

**Figure S2.** The nucleotide acid sequences of N and S regions.

[illegible]

|          |         |        |                                                                                    |      |
|----------|---------|--------|------------------------------------------------------------------------------------|------|
| KX671974 | rapa rf | (481)  | GTACACATTAAACACCCCTCCTCAATGGGCTATGTCTCGAGGGCAGAGCTCTTGAAGCTGTGGAGTTAGTTGATTGTATGGT | 640  |
| KX671969 | rapa Rf | (561)  | CCTAAGCCAAACATGTACCAGATCTCATCACCCTCAACACTTTGTCAATGGGCTTTGTCTCAAAGATAGAGTGTCTGAAG   | 640  |
| KX671968 | rapa Rf | (561)  | CCTAAGCCAAACATGTACCAGATCTCATCACCCTCAACACTTTGTCAATGGGCTTTGTCTCAAAGATAGAGTGTCTGAAG   | 640  |
| KX671967 | rapa Rf | (561)  | CCTAAGCCAAACATGTACCAGATCTCATCACCCTCAACACTTTGTCAATGGGCTTTGTCTCAAAGATAGAGTGTCTGAAG   | 640  |
| EF584011 | Rf      | (561)  | CCTAAGCCAAACATGTACCAGATCTCATCACCCTCAACACTTTGTCAATGGGCTTTGTCTCAAAGATAGAGTGTCTGAAG   | 640  |
| KX671970 | rapa rf | (561)  | CCTAAGCCAAACATGTACCAGATCTCATCACCCTCAACACTTTGTCAATGGGCTTTGTCTCAAAGATAGAGTGTCTGAAG   | 640  |
| KX671971 | rapa rf | (561)  | CCTAAGCCAAACATGTACCAGATCTCATCACCCTCAACACTTTGTCAATGGGCTTTGTCTCAAAGATAGAGTGTCTGAAG   | 640  |
| KX671972 | rapa rf | (561)  | CCTAAGCCAAACATGTACCAGATCTCATCACCCTCAACACTTTGTCAATGGGCTTTGTCTCAAAGATAGAGTGTCTGAAG   | 640  |
| KX671973 | rapa rf | (561)  | CCTAAGCCAAACATGTACCAGATCTCATCACCCTCAACACTTTGTCAATGGGCTTTGTCTCAAAGATAGAGTGTCTGAAG   | 640  |
| KX671974 | rapa rf | (561)  | CCTAAGCCAAACATGTACCAGATCTCATCACCCTCAACACTTTGTCAATGGGCTTTGTCTCAAAGATAGAGTGTCTGAAG   | 640  |
| KX671969 | rapa Rf | (641)  | CAGTGGATTTAATAGCTCGAATGATGGCTAATGGATGTCAACCCAATCAGTTTACCTATGGTCCAATCTTGAACAGAATG   | 720  |
| KX671968 | rapa Rf | (641)  | CAGTGGATTTAATAGCTCGAATGATGGCTAATGGATGTCAACCCAATCAGTTTACCTATGGTCCAATCTTGAACAGAATG   | 720  |
| KX671967 | rapa Rf | (641)  | CAGTGGATTTAATAGCTCGAATGATGGCTAATGGATGTCAACCCAATCAGTTTACCTATGGTCCAATCTTGAACAGAATG   | 720  |
| EF584011 | Rf      | (641)  | CAGTGGATTTAATAGCTCGAATGATGGCTAATGGATGTCAACCCAATCAGTTTACCTATGGTCCAATCTTGAACAGAATG   | 720  |
| KX671970 | rapa rf | (641)  | CAGTGGATTTAATAGCTCGAATGATGGCTAATGGATGTCAACCCAATCAGTTTACCTATGGTCCAATCTTGAACAGAATG   | 720  |
| KX671971 | rapa rf | (641)  | CAGTGGATTTAATAGCTCGAATGATGGCTAATGGATGTCAACCCAATCAGTTTACCTATGGTCCAATCTTGAACAGAATG   | 720  |
| KX671972 | rapa rf | (641)  | CAGTGGATTTAATAGCTCGAATGATGGCTAATGGATGTCAACCCAATCAGTTTACCTATGGTCCAATCTTGAACAGAATG   | 720  |
| KX671973 | rapa rf | (641)  | CAGTGGATTTAATAGCTCGAATGATGGCTAATGGATGTCAACCCAATCAGTTTACCTATGGTCCAATCTTGAACAGAATG   | 720  |
| KX671974 | rapa rf | (641)  | CAGTGGATTTAATAGCTCGAATGATGGCTAATGGATGTCAACCCAATCAGTTTACCTATGGTCCAATCTTGAACAGAATG   | 720  |
| KX671969 | rapa Rf | (721)  | TGTAAGTCTGGGAACACTGCCTCGGCCCTGGATCTGCTCAGGAAGATGGAACATAGAAAGATCAAGCCACACGTAGTCAC   | 800  |
| KX671968 | rapa Rf | (721)  | TGTAAGTCTGGGAACACTGCCTCGGCCCTGGATCTGCTCAGGAAGATGGAACATAGAAAGATCAAGCCACACGTAGTCAC   | 800  |
| KX671967 | rapa Rf | (721)  | TGTAAGTCTGGGAACACTGCCTCGGCCCTGGATCTGCTCAGGAAGATGGAACATAGAAAGATCAAGCCACACGTAGTCAC   | 800  |
| EF584011 | Rf      | (721)  | TGTAAGTCTGGGAACACTGCCTCGGCCCTGGATCTGCTCAGGAAGATGGAACATAGAAAGATCAAGCCACACGTAGTCAC   | 800  |
| KX671970 | rapa rf | (721)  | TGTAAGTCTGGGAACACTGCCTCGGCCCTGGATCTGCTCAGGAAGATGGAACATAGAAAGATCAAGCCACACGTAGTCAC   | 800  |
| KX671971 | rapa rf | (721)  | TGTAAGTCTGGGAACACTGCCTCGGCCCTGGATCTGCTCAGGAAGATGGAACATAGAAAGATCAAGCCACACGTAGTCAC   | 800  |
| KX671972 | rapa rf | (721)  | TGTAAGTCTGGGAACACTGCCTCGGCCCTGGATCTGCTCAGGAAGATGGAACATAGAAAGATCAAGCCACACGTAGTCAC   | 800  |
| KX671973 | rapa rf | (721)  | TGTAAGTCTGGGAACACTGCCTCGGCCCTGGATCTGCTCAGGAAGATGGAACATAGAAAGATCAAGCCACACGTAGTCAC   | 800  |
| KX671974 | rapa rf | (721)  | TGTAAGTCTGGGAACACTGCCTCGGCCCTGGATCTGCTCAGGAAGATGGAACATAGAAAGATCAAGCCACACGTAGTCAC   | 800  |
| KX671969 | rapa Rf | (801)  | ATACATATCATCATTGACAATCTTTGCAAAGATGGGAGACTCGACGATGCACCTCAGCTTTTTTCAGTGAATGGAACCCA   | 960  |
| KX671968 | rapa Rf | (801)  | ATACATATCATCATTGACAATCTTTGCAAAGATGGGAGACTCGACGATGCACCTCAGCTTTTTTCAGTGAATGGAACCCA   | 960  |
| KX671967 | rapa Rf | (801)  | ATACATATCATCATTGACAATCTTTGCAAAGATGGGAGACTCGACGATGCACCTCAGCTTTTTTCAGTGAATGGAACCCA   | 960  |
| EF584011 | Rf      | (801)  | ATACATATCATCATTGACAATCTTTGCAAAGATGGGAGACTCGACGATGCACCTCAGCTTTTTTCAGTGAATGGAACCCA   | 960  |
| KX671970 | rapa rf | (801)  | ATACATATCATCATTGACAATCTTTGCAAAGATGGGAGACTCGACGATGCACCTCAGCTTTTTTCAGTGAATGGAACCCA   | 960  |
| KX671971 | rapa rf | (801)  | ATACATATCATCATTGACAATCTTTGCAAAGATGGGAGACTCGACGATGCACCTCAGCTTTTTTCAGTGAATGGAACCCA   | 960  |
| KX671972 | rapa rf | (801)  | ATACATATCATCATTGACAATCTTTGCAAAGATGGGAGACTCGACGATGCACCTCAGCTTTTTTCAGTGAATGGAACCCA   | 960  |
| KX671973 | rapa rf | (801)  | ATACATATCATCATTGACAATCTTTGCAAAGATGGGAGACTCGACGATGCACCTCAGCTTTTTTCAGTGAATGGAACCCA   | 960  |
| KX671974 | rapa rf | (801)  | ATACATATCATCATTGACAATCTTTGCAAAGATGGGAGACTCGACGATGCACCTCAGCTTTTTTCAGTGAATGGAACCCA   | 960  |
| KX671969 | rapa Rf | (881)  | AAGGGATCAAAGCAAAATGTCTTTACCTACAACCTCTCTCATAGGAAGCTTCTGTAGTTTTGGCAGATGGGATGATGGTGCA | 1040 |
| KX671968 | rapa Rf | (881)  | AAGGGATCAAAGCAAAATGTCTTTACCTACAACCTCTCTCATAGGAAGCTTCTGTAGTTTTGGCAGATGGGATGATGGTGCA | 1040 |
| KX671967 | rapa Rf | (881)  | AAGGGATCAAAGCAAAATGTCTTTACCTACAACCTCTCTCATAGGAAGCTTCTGTAGTTTTGGCAGATGGGATGATGGTGCA | 1040 |
| EF584011 | Rf      | (881)  | AAGGGATCAAAGCAAAATGTCTTTACCTACAACCTCTCTCATAGGAAGCTTCTGTAGTTTTGGCAGATGGGATGATGGTGCA | 1040 |
| KX671970 | rapa rf | (881)  | AAGGGATCAAAGCAAAATGTCTTTACCTACAACCTCTCTCATAGGAAGCTTCTGTAGTTTTGGCAGATGGGATGATGGTGCA | 1040 |
| KX671971 | rapa rf | (881)  | AAGGGATCAAAGCAAAATGTCTTTACCTACAACCTCTCTCATAGGAAGCTTCTGTAGTTTTGGCAGATGGGATGATGGTGCA | 1040 |
| KX671972 | rapa rf | (881)  | AAGGGATCAAAGCAAAATGTCTTTACCTACAACCTCTCTCATAGGAAGCTTCTGTAGTTTTGGCAGATGGGATGATGGTGCA | 1040 |
| KX671973 | rapa rf | (881)  | AAGGGATCAAAGCAAAATGTCTTTACCTACAACCTCTCTCATAGGAAGCTTCTGTAGTTTTGGCAGATGGGATGATGGTGCA | 1040 |
| KX671974 | rapa rf | (881)  | AAGGGATCAAAGCAAAATGTCTTTACCTACAACCTCTCTCATAGGAAGCTTCTGTAGTTTTGGCAGATGGGATGATGGTGCA | 1040 |
| KX671969 | rapa Rf | (961)  | CAGTTGCTGAGGGATATGATTACAAGGAAAATCACCCCAACGTTGTCACTTTCAGTGCTTTGATTGATAGTCTTGTTAA    | 1120 |
| KX671968 | rapa Rf | (961)  | CAGTTGCTGAGGGATATGATTACAAGGAAAATCACCCCAACGTTGTCACTTTCAGTGCTTTGATTGATAGTCTTGTTAA    | 1120 |
| KX671967 | rapa Rf | (961)  | CAGTTGCTGAGGGATATGATTACAAGGAAAATCACCCCAACGTTGTCACTTTCAGTGCTTTGATTGATAGTCTTGTTAA    | 1120 |
| EF584011 | Rf      | (961)  | CAGTTGCTGAGGGATATGATTACAAGGAAAATCACCCCAACGTTGTCACTTTCAGTGCTTTGATTGATAGTCTTGTTAA    | 1120 |
| KX671970 | rapa rf | (961)  | CAGTTGCTGAGGGATATGATTACAAGGAAAATCACCCCAACGTTGTCACTTTCAGTGCTTTGATTGATAGTCTTGTTAA    | 1120 |
| KX671971 | rapa rf | (961)  | CAGTTGCTGAGGGATATGATTACAAGGAAAATCACCCCAACGTTGTCACTTTCAGTGCTTTGATTGATAGTCTTGTTAA    | 1120 |
| KX671972 | rapa rf | (961)  | CAGTTGCTGAGGGATATGATTACAAGGAAAATCACCCCAACGTTGTCACTTTCAGTGCTTTGATTGATAGTCTTGTTAA    | 1120 |
| KX671973 | rapa rf | (961)  | CAGTTGCTGAGGGATATGATTACAAGGAAAATCACCCCAACGTTGTCACTTTCAGTGCTTTGATTGATAGTCTTGTTAA    | 1120 |
| KX671974 | rapa rf | (961)  | CAGTTGCTGAGGGATATGATTACAAGGAAAATCACCCCAACGTTGTCACTTTCAGTGCTTTGATTGATAGTCTTGTTAA    | 1120 |
| KX671969 | rapa Rf | (1041) | AGAGGGAAAGCTTACTGAGGCTAAAGACTTGTACAATGAGATGATCACAAGAGGCATAGAGCCTAACACCATTACATATA   | 1120 |
| KX671968 | rapa Rf | (1041) | AGAGGGAAAGCTTACTGAGGCTAAAGACTTGTACAATGAGATGATCACAAGAGGCATAGAGCCTAACACCATTACATATA   | 1120 |
| KX671967 | rapa Rf | (1041) | AGAGGGAAAGCTTACTGAGGCTAAAGACTTGTACAATGAGATGATCACAAGAGGCATAGAGCCTAACACCATTACATATA   | 1120 |
| EF584011 | Rf      | (1041) | AGAGGGAAAGCTTACTGAGGCTAAAGACTTGTACAATGAGATGATCACAAGAGGCATAGAGCCTAACACCATTACATATA   | 1120 |
| KX671970 | rapa rf | (1041) | AGAGGGAAAGCTTACTGAGGCTAAAGACTTGTACAATGAGATGATCACAAGAGGCATAGAGCCTAACACCATTACATATA   | 1120 |
| KX671971 | rapa rf | (1041) | AGAGGGAAAGCTTACTGAGGCTAAAGACTTGTACAATGAGATGATCACAAGAGGCATAGAGCCTAACACCATTACATATA   | 1120 |
| KX671972 | rapa rf | (1041) | AGAGGGAAAGCTTACTGAGGCTAAAGACTTGTACAATGAGATGATCACAAGAGGCATAGAGCCTAACACCATTACATATA   | 1120 |

|          |         |        |                                                                                   |      |      |
|----------|---------|--------|-----------------------------------------------------------------------------------|------|------|
| KX671973 | rapa rf | (1041) | AGAGGGAAAGCTTACTGAGGCTAAAGACTTGTACAATGAGATGATCACAAGAGGCATAGATCCTAATACCATTACATATA  | 1121 | 1200 |
| KX671974 | rapa rf | (1041) | AGAGGGAAAGCTTACTGAGGCTAAAGACTTGTACAATGAGATGATCACAAGAGGCATAGATCCTAATACCATTACATATA  |      |      |
| KX671969 | rapa Rf | (1121) | ATTCTTTGATATATGGGCTGTGCAACGACAAGCGCTTAGATGAAGCCAACCAGATGATGGACCTGATGGTTAGCAAGGGA  |      |      |
| KX671968 | rapa Rf | (1121) | ATTCTTTGATATATGGGCTGTGCAACGACAAGCGCTTAGATGAAGCCAACCAGATGATGGACCTGATGGTTAGCAAGGGA  |      |      |
| KX671967 | rapa Rf | (1121) | ATTCTTTGATATATGGGCTGTGCAACGACAAGCGCTTAGATGAAGCCAACCAGATGATGGACCTGATGGTTAGCAAGGGA  |      |      |
| EF584011 | Rf      | (1121) | ATTCTTTGATATATGGGCTGTGCAACGACAAGCGCTTAGATGAAGCCAACCAGATGATGGACCTGATGGTTAGCAAGGGA  |      |      |
| KX671970 | rapa rf | (1121) | ATTCTTTGATATATGGGCTGTGCAACGACAAGCGCTTAGATGAAGCCAACCAGATGATGGACCTGATGGTTAGCAAGGGA  |      |      |
| KX671971 | rapa rf | (1121) | ATTCTTTGATATATGGGCTGTGCAACGACAAGCGCTTAGATGAAGCCAACCAGATGATGGACCTGATGGTTAGCAAGGGA  |      |      |
| KX671972 | rapa rf | (1121) | GTACTTTGATATATGGGTTGTGCAATGAGAACCGCTTAGATGAAGCCAACCAGATGATGGACCTCATGGTTAGCAAGGGA  |      |      |
| KX671973 | rapa rf | (1121) | GTACTTTGATATATGGGTTGTGCAATGAGAACCGCTTAGATGAAGCCAACCAGATGATGGACCTCATGGTTAGCAAGGGA  |      |      |
| KX671974 | rapa rf | (1121) | GTACTTTGATATATGGGTTGTGCAATGAGAACCGCTTAGATGAAGCCAACCAGATGATGGACCTCATGGTTAGCAAGGGA  |      |      |
| KX671969 | rapa Rf | (1201) | TGCGATCCTGATATTGACGCTATAATAATCCTTATAAACGGATTTTGTAAAGCTAAACAGGTTGATGATGGTATGAGACT  | 1201 | 1280 |
| KX671968 | rapa Rf | (1201) | TGCGATCCTGATATTGACGCTATAATAATCCTTATAAACGGATTTTGTAAAGCTAAACAGGTTGATGATGGTATGAGACT  |      |      |
| KX671967 | rapa Rf | (1201) | TGCGATCCTGATATTGACGCTATAATAATCCTTATAAACGGATTTTGTAAAGCTAAACAGGTTGATGATGGTATGAGACT  |      |      |
| EF584011 | Rf      | (1201) | TGCGATCCTGATATTGACGCTATAATAATCCTTATAAACGGATTTTGTAAAGCTAAACAGGTTGATGATGGTATGAGACT  |      |      |
| KX671970 | rapa rf | (1201) | TGCGATCCTGATATTGACGCTATAATAATCCTTATAAACGGATTTTGTAAAGCTAAACAGGTTGATGATGGTATGAGACT  |      |      |
| KX671971 | rapa rf | (1201) | TGCGATCCTGATATTGACGCTATAATAATCCTTATAAACGGATTTTGTAAAGCTAAACAGGTTGATGATGGTATGAGACT  |      |      |
| KX671972 | rapa rf | (1201) | TGCGATCCTGATATTGACGCTATAATAATCCTTATAAACGGATTTTGTAAAGCTAAACAGGTTGATGATGGTATGAGACT  |      |      |
| KX671973 | rapa rf | (1201) | TGCGATCCTGATATTGACGCTATAATAATCCTTATAAACGGATTTTGTAAAGCTAAACAGGTTGATGATGGTATGAGACT  |      |      |
| KX671974 | rapa rf | (1201) | TGCGATCCTGATATTGACGCTATAATAATCCTTATAAACGGATTTTGTAAAGCTAAACAGGTTGATGATGGTATGAGACT  |      |      |
| KX671969 | rapa Rf | (1281) | ATTCCGAAAGATGTCTCTGAGAGGAATGATTGCAGATACAGTGACTTATAGCACTCTCATCCAAGGGTTTGTCAATCAA   | 1281 | 1360 |
| KX671968 | rapa Rf | (1281) | ATTCCGAAAGATGTCTCTGAGAGGAATGATTGCAGATACAGTGACTTATAGCACTCTCATCCAAGGGTTTGTCAATCAA   |      |      |
| KX671967 | rapa Rf | (1281) | ATTCCGAAAGATGTCTCTGAGAGGAATGATTGCAGATACAGTGACTTATAGCACTCTCATCCAAGGGTTTGTCAATCAA   |      |      |
| EF584011 | Rf      | (1281) | ATTCCGAAAGATGTCTCTGAGAGGAATGATTGCAGATACAGTGACTTATAGCACTCTCATCCAAGGGTTTGTCAATCAA   |      |      |
| KX671970 | rapa rf | (1281) | ATTCCGAAAGATGTCTCTGAGAGGAATGATTGCAGATACAGTGACTTATAGCACTCTCATCCAAGGGTTTGTCAATCAA   |      |      |
| KX671971 | rapa rf | (1281) | ATTCCGAAAGATGTCTCTGAGAGGAATGATTGCAGATACAGTGACTTATAGCACTCTCATCCAAGGGTTTGTCAATCAA   |      |      |
| KX671972 | rapa rf | (1281) | ATTCCGAAAGATGTCTCTGAGAGGAATGATTGCAGATACAGTGACTTATAGCACTCTCATCCAAGGGTTTGTCAATCAA   |      |      |
| KX671973 | rapa rf | (1281) | ATTCCGAAAGATGTCTCTGAGAGGAATGATTGCAGATACAGTGACTTATAGCACTCTCATCCAAGGGTTTGTCAATCAA   |      |      |
| KX671974 | rapa rf | (1281) | ATTCCGAAAGATGTCTCTGAGAGGAATGATTGCAGATACAGTGACTTATAGCACTCTCATCCAAGGGTTTGTCAATCAA   |      |      |
| KX671969 | rapa Rf | (1361) | GAAAACTTATTGTGCGCAAAAAAGTCTTCCAAGAGATGGTCTCTCAAGGTGTTTCATCTGGTATTATGACTTATGCTATT  | 1361 | 1440 |
| KX671968 | rapa Rf | (1361) | GAAAACTTATTGTGCGCAAAAAAGTCTTCCAAGAGATGGTCTCTCAAGGTGTTTCATCTGGTATTATGACTTATGCTATT  |      |      |
| KX671967 | rapa Rf | (1361) | GAAAACTTATTGTGCGCAAAAAAGTCTTCCAAGAGATGGTCTCTCAAGGTGTTTCATCTGGTATTATGACTTATGCTATT  |      |      |
| EF584011 | Rf      | (1361) | GAAAACTTATTGTGCGCAAAAAAGTCTTCCAAGAGATGGTCTCTCAAGGTGTTTCATCTGGTATTATGACTTATGCTATT  |      |      |
| KX671970 | rapa rf | (1361) | GAAAACTTATTGTGCGCAAAAAAGTCTTCCAAGAGATGGTCTCTCAAGGTGTTTCATCTGGTATTATGACTTATGCTATT  |      |      |
| KX671971 | rapa rf | (1361) | GAAAACTTATTGTGCGCAAAAAAGTCTTCCAAGAGATGGTCTCTCAAGGTGTTTCATCTGGTATTATGACTTATGCTATT  |      |      |
| KX671972 | rapa rf | (1361) | GAAAACTTATTGTGCGCAAAAAAGTCTTCCAAGAGATGGTCTCTCAAGGTGTTTCATCTGGTATTATGACTTATGCTATT  |      |      |
| KX671973 | rapa rf | (1361) | GAAAACTTATTGTGCGCAAAAAAGTCTTCCAAGAGATGGTCTCTCAAGGTGTTTCATCTGGTATTATGACTTATGCTATT  |      |      |
| KX671974 | rapa rf | (1361) | GAAAACTTATTGTGCGCAAAAAAGTCTTCCAAGAGATGGTCTCTCAAGGTGTTTCATCTGGTATTATGACTTATGCTATT  |      |      |
| KX671969 | rapa Rf | (1441) | TTGCTGGATGGGTTGTGTGACAATGGCGAACTAGAAGAGGCTTTGGGAATACTTGATCAAATGCACAAGTGAAGATGGA   | 1441 | 1520 |
| KX671968 | rapa Rf | (1441) | TTGCTGGATGGGTTGTGTGACAATGGCGAACTAGAAGAGGCTTTGGGAATACTTGATCAAATGCACAAGTGAAGATGGA   |      |      |
| KX671967 | rapa Rf | (1441) | TTGCTGGATGGGTTGTGTGACAATGGCGAACTAGAAGAGGCTTTGGGAATACTTGATCAAATGCACAAGTGAAGATGGA   |      |      |
| EF584011 | Rf      | (1441) | TTGCTGGATGGGTTGTGTGACAATGGCGAACTAGAAGAGGCTTTGGGAATACTTGATCAAATGCACAAGTGAAGATGGA   |      |      |
| KX671970 | rapa rf | (1441) | TTGCTGGATGGGTTGTGTGACAATGGCGAACTAGAAGAGGCTTTGGGAATACTTGATCAAATGCACAAGTGAAGATGGA   |      |      |
| KX671971 | rapa rf | (1441) | TTGCTGGATGGGTTGTGTGACAATGGCGAACTAGAAGAGGCTTTGGGAATACTTGATCAAATGCACAAGTGAAGATGGA   |      |      |
| KX671972 | rapa rf | (1441) | TTGCTGGATGGGTTGTGTGACAATGGCGAACTAGAAGAGGCTTTGGGAATACTTGATCAAATGCACAAGTGAAGATGGA   |      |      |
| KX671973 | rapa rf | (1441) | TTGCTGGATGGGTTGTGTGACAATGGCGAACTAGAAGAGGCTTTGGGAATACTTGATCAAATGCACAAGTGAAGATGGA   |      |      |
| KX671974 | rapa rf | (1441) | TTGCTGGATGGGTTGTGTGACAATGGCGAACTAGAAGAGGCTTTGGGAATACTTGATCAAATGCACAAGTGAAGATGGA   |      |      |
| KX671969 | rapa Rf | (1521) | ACTTGATATTGGTATATATAATATCATCATTACAGGGATGTGCAATGCAAAATAAGGTCGATGATGCTTGGAGTTTGTCT  | 1521 | 1600 |
| KX671968 | rapa Rf | (1521) | ACTTGATATTGGTATATATAATATCATCATTACAGGGATGTGCAATGCAAAATAAGGTCGATGATGCTTGGAGTTTGTCT  |      |      |
| KX671967 | rapa Rf | (1521) | ACTTGATATTGGTATATATAATATCATCATTACAGGGATGTGCAATGCAAAATAAGGTCGATGATGCTTGGAGTTTGTCT  |      |      |
| EF584011 | Rf      | (1521) | ACTTGATATTGGTATATATAATATCATCATTACAGGGATGTGCAATGCAAAATAAGGTCGATGATGCTTGGAGTTTGTCT  |      |      |
| KX671970 | rapa rf | (1521) | ACTTGATATTGGTATATATAATATCATCATTACAGGGATGTGCAATGCAAAATAAGGTCGATGATGCTTGGAGTTTGTCT  |      |      |
| KX671971 | rapa rf | (1521) | ACTTGATATTGGTATATATAATATCATCATTACAGGGATGTGCAATGCAAAATAAGGTCGATGATGCTTGGAGTTTGTCT  |      |      |
| KX671972 | rapa rf | (1521) | ACTTGATATTGGTATATATAGTATCATCATTACAGGGATGTGCAATGCAAGTAAGATCGATGATGCTTGGAGTTCTATTCT |      |      |
| KX671973 | rapa rf | (1521) | ACTTGATATTGGTATATATAGTATCATCATTACAGGGATGTGCAATGCAAGTAAGATCGATGATGCTTGGAGTTCTATTCT |      |      |
| KX671974 | rapa rf | (1521) | ACTTGATATTGGTATATATAGTATCATCATTACAGGGATGTGCAATGCAAGTAAGATCGATGATGCTTGGAGTTCTATTCT |      |      |
| KX671969 | rapa Rf | (1601) | GTAGCCTCTCTCTCAAGGAGTGAAGCGTGATATTCAAGTATACAACATAATGTTGTGAGGATTATGTAAGGAGGAGCTCA  | 1601 | 1680 |
| KX671968 | rapa Rf | (1601) | GTAGCCTCTCTCTCAAGGAGTGAAGCGTGATATTCAAGTATACAACATAATGTTGTGAGGATTATGTAAGGAGGAGCTCA  |      |      |
| KX671967 | rapa Rf | (1601) | GTAGCCTCTCTCTCAAGGAGTGAAGCGTGATATTCAAGTATACAACATAATGTTGTGAGGATTATGTAAGGAGGAGCTCA  |      |      |
| EF584011 | Rf      | (1601) | GTAGCCTACCTTCGAAGGAGTGAAGCGTGATATTCAAGTATACAACATAATGTTGTGAGGATTATGTAAGGAGGAGCTCA  |      |      |
| KX671970 | rapa rf | (1601) | GTAGCCTACCTTCGAAGGAGTGAAGCGTGATATTCAAGTATACAACATAATGTTGTGAGGATTATGTAAGGAGGAGCTCA  |      |      |

|          |         |        |                                                                                   |
|----------|---------|--------|-----------------------------------------------------------------------------------|
| KX671971 | rapa rf | (1601) | GTAGCCTACCTCGAAAGGAGTGAAGCGTGATTCAGTCATACAACATAATGTTGTCAGGATTATGTAAAGGAGCTCA      |
| KX671972 | rapa rf | (1601) | GTAGCCTCTCTCTCAAGGAGTGAAGCGTGATTCAGTCATACAACATAATGTTGTCAGGATTATGTAAAGGAGCTCA      |
| KX671973 | rapa rf | (1601) | GTAGCCTCTCTCTCAAGGAGTGAAGCGTGATTCAGTCATACAACATAATGTTGTCAGGATTATGTAAAGGAGCTCA      |
| KX671974 | rapa rf | (1601) | GTAGCCTCTCTCTCAAGGAGTGAAGCGTGATTCAGTCATACAACATAATGTTGTCAGGATTATGTAAAGGAGCTCA      |
|          |         |        | 1681 1760                                                                         |
| KX671969 | rapa Rf | (1681) | TTGTCTGAAGCGGATGCATTGTTTAGAAAAATGAAGGAAGATGGGTATGAGCCAGATGGTTGTACGTACAATACACTTAT  |
| KX671968 | rapa Rf | (1681) | TTGTCTGAAGCGGATGCATTGTTTAGAAAAATGAAGGAAGATGGGTATGAGCCAGATGGTTGTACGTACAATACACTTAT  |
| KX671967 | rapa Rf | (1681) | TTGTCTGAAGCGGATGCATTGTTTAGAAAAATGAAGGAAGATGGGTATGAGCCAGATGGTTGTACGTACAATACACTTAT  |
| EF584011 | Rf      | (1681) | TTGTCTGAAGCGGATGCATTGTTTAGAAAAATGAAGGAAGATGGGTATGAGCCAGATGGTTGTACGTACAATACACTTAT  |
| KX671970 | rapa rf | (1681) | TTGTCTGAAGCGGATGCATTGTTTAGAAAAATGAAGGAAGATGGGTATGAGCCAGATGGTTGTACGTACAATACACTTAT  |
| KX671971 | rapa rf | (1681) | TTGTCTGAAGCGGATGCATTGTTTAGAAAAATGAAGGAAGATGGGTATGAGCCAGATGGTTGTACGTACAATACACTTAT  |
| KX671972 | rapa rf | (1681) | TTGTCTGAAGCGGATGCATTGTTTAGAAAAATGAAGGAAGATGGGTATGAGCCAGATGGTTGTACGTACAATACACTTAT  |
| KX671973 | rapa rf | (1681) | TTGTCTGAAGCGGATGCATTGTTTAGAAAAATGAAGGAAGATGGGTATGAGCCAGATGGTTGTACGTACAATACACTTAT  |
| KX671974 | rapa rf | (1681) | TTGTCTGAAGCGGATGCATTGTTTAGAAAAATGAAGGAAGATGGGTATGAGCCAGATGGTTGTACGTACAATACACTTAT  |
|          |         |        | 1761 1840                                                                         |
| KX671969 | rapa Rf | (1761) | CAGAGCACATCTTCGAGGTAATGACATAACAACCTTCAGTTCAACTCATTGAAGAAATGAAGAGGTGTGGGTTCTCTTCAG |
| KX671968 | rapa Rf | (1761) | CAGAGCACATCTTCGAGGTAATGACATAACAACCTTCAGTTCAACTCATTGAAGAAATGAAGAGGTGTGGGTTCTCTTCAG |
| KX671967 | rapa Rf | (1761) | CAGAGCACATCTTCGAGGTAATGACATAACAACCTTCAGTTCAACTCATTGAAGAAATGAAGAGGTGTGGGTTCTCTTCAG |
| EF584011 | Rf      | (1761) | CAGAGCACATCTTCGAGGTAATGACATAACAACCTTCAGTTCAACTCATTGAAGAAATGAAGAGGTGTGGGTTCTCTTCAG |
| KX671970 | rapa rf | (1761) | CAGAGCACATCTTCGAGGTAATGACATAACAACCTTCAGTTCAACTCATTGAAGAAATGAAGAGGTGTGGGTTCTCTTCAG |
| KX671971 | rapa rf | (1761) | CAGAGCACATCTTCGAGGTAATGACATAACAACCTTCAGTTCAACTCATTGAAGAAATGAAGAGGTGTGGGTTCTCTTCAG |
| KX671972 | rapa rf | (1761) | CAGAGCACATCTTCGAGGTAATGACATAACAACCTTCAGTTCAACTCATTGAAGAAATGAAGAGGTGTGGGTTCTCTTCAG |
| KX671973 | rapa rf | (1761) | CAGAGCACATCTTCGAGGTAATGACATAACAACCTTCAGTTCAACTCATTGAAGAAATGAAGAGGTGTGGGTTCTCTTCAG |
| KX671974 | rapa rf | (1761) | CAGAGCACATCTTCGAGGTAATGACATAACAACCTTCAGTTCAACTCATTGAAGAAATGAAGAGGTGTGGGTTCTCTTCAG |
|          |         |        | 1841 1920                                                                         |
| KX671969 | rapa Rf | (1841) | ATGCTTCCACCGTAAAGATTGTTATGGATATGTTATCGAGTGGTGAATTGGACAAAAGCTTTCTAAATATGCTTTCTGGT  |
| KX671968 | rapa Rf | (1841) | ATGCTTCCACCGTAAAGATTGTTATGGATATGTTATCGAGTGGTGAATTGGACAAAAGCTTTCTAAATATGCTTTCTGGT  |
| KX671967 | rapa Rf | (1841) | ATGCTTCCACCGTAAAGATTGTTATGGATATGTTATCGAGTGGTGAATTGGACAAAAGCTTTCTAAATATGCTTTCTGGT  |
| EF584011 | Rf      | (1841) | ATGCTTCCACCGTAAAGATTGTTATGGATATGTTATCGAGTGGTGAATTGGACAAAAGCTTTCTAAATATGCTTTCTGGT  |
| KX671970 | rapa rf | (1841) | ATGCTTCCACCGTAAAGATTGTTATGGATATGTTATCGAGTGGTGAATTGGACAAAAGCTTTCTAAATATGCTTTCTGGT  |
| KX671971 | rapa rf | (1841) | ATGCTTCCACCGTAAAGATTGTTATGGATATGTTATCGAGTGGTGAATTGGACAAAAGCTTTCTAAATATGCTTTCTGGT  |
| KX671972 | rapa rf | (1841) | ATGCTTCCACCGTAAAGATTGTTATGGATATGTTATCGAGTGGTGAATTGGACAAAAGCTTTCTAAATATGCTTTCTGGT  |
| KX671973 | rapa rf | (1841) | ATGCTTCCACCGTAAAGATTGTTATGGATATGTTATCGAGTGGTGAATTGGACAAAAGCTTTCTAAATATGCTTTCTGGT  |
| KX671974 | rapa rf | (1841) | ATGCTTCCACCGTAAAGATTGTTATGGATATGTTATCGAGTGGTGAATTGGACAAAAGCTTTCTAAATATGCTTTCTGGT  |
|          |         |        | 1921 1953                                                                         |
| KX671969 | rapa Rf | (1921) | CCTTTTGGAGACAAATCATCATCGTTGGATTGA                                                 |
| KX671968 | rapa Rf | (1921) | CCTTTTGGAGACAAATCATCATCGTTGGATTGA                                                 |
| KX671967 | rapa Rf | (1921) | CCTTTTGGAGACAAATCATCATCGTTGGATTGA                                                 |
| EF584011 | Rf      | (1921) | CCTTTTGGAGACAAATCATCATCGTTGGATTGA                                                 |
| KX671970 | rapa rf | (1921) | CCTTTTGGAGACAAATCATCATCGTTGGATTGA                                                 |
| KX671971 | rapa rf | (1921) | CCTTTTGGAGACAAATCATCATCGTTGGATTGA                                                 |
| KX671972 | rapa rf | (1921) | CCTTTTGGAGACAAATCATCATCGTTGGATTGA                                                 |
| KX671973 | rapa rf | (1921) | CCTTTTGGAGACAAATCATCATCGTTGGATTGA                                                 |
| KX671974 | rapa rf | (1921) | CCTTTTGGAGACAAATCATCATCGTTGGATTGA                                                 |

**Figure S3.** The alignment of *R* and *r* nucleotide acid sequences. 1215-1228 region was the core difference of *R(Rf)* and *r(rf)* genes. GenBank accession numbers of restorer (*R*) genes, KX671969, KX671968, KX671967, EF584011; GenBank accession numbers of recessive nuclear sterile (*r*) genes, KX671970, KX671971, KX671972, KX671973, KX671974.
